# Supplementary material
Source: MDPI journal article supplement (https://www.mdpi.com/2673-6373/3/4/45)
Supplement: s1 [file s1]

# Diagnostic and Prognostic Predictors for the Success of Pulpotomy in Permanent Mature Posterior Teeth with Moderate to Severe Pulpitis: A Scoping Review

Helen McHugh <sup>1,2</sup>, Patricia P. Wright <sup>1,2</sup>, Christine I. Peters <sup>1,2</sup> and Ove A. Peters <sup>1,2,\*</sup>

**Table S1.** Definitions from the textbook by Kirkwood and Sterne [124].

|                           |                                                      |
|---------------------------|------------------------------------------------------|
| Sensitivity               | Proportion of true positives correctly identified    |
| Specificity               | Proportion of true negatives correctly identified    |
| Positive predictive value | Proportion of test positives that are truly positive |
| Negative predictive value | Proportion of test negatives that are truly negative |

**Table S2.** Contingency table developed from the information in Sharma et al. [48].

|                                       | Standard /disease                 |                                      |       |                    |
|---------------------------------------|-----------------------------------|--------------------------------------|-------|--------------------|
|                                       | Pulpotomy fail<br><b>Positive</b> | Pulpotomy success<br><b>Negative</b> | Total |                    |
| <b>Positive</b><br>≥ 334.8ng/mL MMP-9 | 5                                 | 6                                    | 11    | PPV = 5/11 = 45.5% |
| <b>Negative</b> <334.8ng/mL<br>MMP-9  | 0                                 | 29                                   | 29    | NPV = 29/29 = 100% |
| Total                                 | 5                                 | 35                                   | 40    |                    |
|                                       | Sensitivity = 5/5<br>= 100%       | Specificity = 29/35 =<br>83%         |       |                    |

Legend: NPV, negative predictive value, PPV, positive predictive value

The paper by Sharma et al. [48] states that the cut-off MMP-9 concentration ([MMP-9]) to predict the outcome (success or failure) of a complete pulpotomy is 334.8 ng/mL. A positive test result of ≥334.8 ng/mL predicts pulpotomy failure and a negative result of <334.8 ng/mL predicts pulpotomy success. They identified a sensitivity value of 100% and a specificity value of 83%. Forty pulpotomies were performed, of which 35 were successful and 5 failed. As seen in Table 4, the number of true negatives (29) was calculated based on  $x/35=83\%$  (where  $x$  is the number of true negatives). The number 6 in the table is the number of false test positives and was calculated to add up to the total number of cases that were a success (35). The number of false test positives is the number of cases predicted to fail that were actually a success.

According to the above table, the following statement in the paper is incorrect; “The 83% specificity of the test suggests that only 17% of teeth with aMMP-9 concentration ≥ 334.8 ng mL<sup>-1</sup> will have a successful outcome after pulpotomy.” This is because 6 of a total of 11 cases (54.5%) that had a [MMP-9] of ≥334.8 ng/mL were actually successful. In fact, only 5 out of 11 failures were correctly predicted by the test to fail, resulting in a positive predictive value of 45.5%. In summary, of the teeth where the test indicated no pulpotomy should be performed, more than half could have had a successful pulpotomy.

If the findings of this paper alone were used to develop a chairside diagnostic test, an MMP-9 concentration of ≥ 334.8 ng/mL would encourage the clinician to not perform the pulpotomy despite half of these cases potentially being a success.
